# Supplementary material
Source: PubMed Central journal article supplement (PMC6442339)
Supplement: ASN.2018080814SupplementaryData1.pdf [file ASN.2018080814SupplementaryData1.pdf]

**Figure 1. Continuum of clinical and generic outcomes**

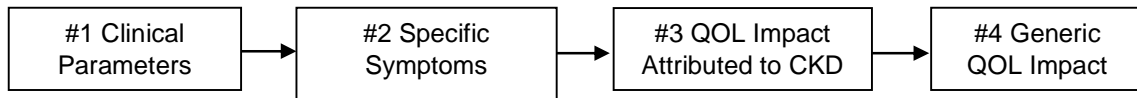

Figure 2. Comparison of QOL Domain Content, Generic and CKD-Specific Measures

| Domains and Abbreviated Item Content for SF-12v2, CKD-QOL-6 and KDQOL-36 Items†           | Generic | CKD-Specific |              |                  |
|-------------------------------------------------------------------------------------------|---------|--------------|--------------|------------------|
|                                                                                           | SF-12v2 | CKD-QOL-6    | KDQOL Burden | Effects Symptoms |
| <b>Physical functioning</b>                                                               |         |              |              |                  |
| Limited in moderate activities, climbing stairs                                           | •       |              |              |                  |
| <b>Role functioning</b>                                                                   |         |              |              |                  |
| Limited in kind of work/activities; accomplished less; did work/activities less carefully | •       |              |              |                  |
| Kidney disease restricted usual daily activities(a)                                       |         | •            |              |                  |
| Kidney disease bothers ability to work around house                                       |         |              |              | •                |
| <b>Pain (bodily)</b>                                                                      |         |              |              |                  |
| Pain interfered with normal work including housework                                      | •       |              |              |                  |
| Bothered by soreness in muscles                                                           |         |              |              | •                |
| Bothered by chest pain                                                                    |         |              |              | •                |
| <b>General health evaluation</b>                                                          |         |              |              |                  |
| Health is excellent/poor                                                                  | •       |              |              |                  |
| <b>Energy/fatigue</b>                                                                     |         |              |              |                  |
| Amount of time had a lot of energy                                                        | •       |              |              |                  |
| Kidney disease left too tired for work, daily activities(c)                               |         | •            |              |                  |
| Bothered by being washed out or drained                                                   |         |              |              | •                |
| <b>Social functioning/burden</b>                                                          |         |              |              |                  |
| Health interfered with social activities                                                  | •       |              |              |                  |
| Kidney disease kept from enjoying social activities(b)                                    |         | •            |              |                  |
| Feel like a burden on family                                                              |         |              | •            |                  |
| <b>Mental health (psychological distress/well-being)</b>                                  |         |              |              |                  |
| Felt downhearted, depressed; felt calm, peaceful                                          | •       |              |              |                  |
| Fed up or frustrated because of kidney disease(c)                                         |         | •            |              |                  |
| Feel frustrated dealing with kidney disease                                               |         |              | •            |                  |
| Bothered by stress/worries caused by kidney disease                                       |         |              |              | •                |
| <b>Life interference/quality of life</b>                                                  |         |              |              |                  |
| Kidney disease limited usual activities, enjoyment of everyday life (d)                   |         | •            |              |                  |
| Kidney disease interferes too much with life                                              |         |              | •            |                  |
| Too much time spent dealing with kidney disease                                           |         |              | •            |                  |
| Kidney disease bothers ability to travel                                                  |         |              |              | •                |
| Other effects of kidney disease on daily life*                                            |         |              |              | •                |
| <b>Cognitive functioning</b>                                                              |         |              |              |                  |
| Kidney disease limited ability to concentrate on work or daily activities(c)              |         | •            |              |                  |
| <b>Other symptoms**</b>                                                                   |         |              |              | •                |

† Dotted lines separate SF-12v2, CKD-QOL-6 and KDQOL items

\* Other KDQOL Effects: Bothered by fluid restriction, dietary restriction, dependent on doctors/staff, sex life, personal appearance

\*\* Other KDQOL Symptoms: Bothered by cramps, itchy skin, dry skin, shortness of breath, faintness/dizziness, lack of appetite, numbness in hands/feet, nausea/upset stomach, problems with access or catheter site

KDQOL Burden responses: Definitely true, mostly true, don't know, mostly false, definitely false.

KDQOL Effects and Symptoms responses: Not at all bothered, somewhat bothered, moderately bothered, very much bothered, extremely bothered.

CKD-QOL-6 responses (a) Not at all, very little, somewhat, quite a lot, could not do activities; (b) None of the time, a little of the time, some of the time, most of the time, all of the time; (c) Never, almost never, sometimes, very often, always; (d) Not at all, a little, moderately, quite a lot, extremely.

Figure 3. Ranges of Variance<sup>a</sup> Explained and Relative Validity (RV) for Measures

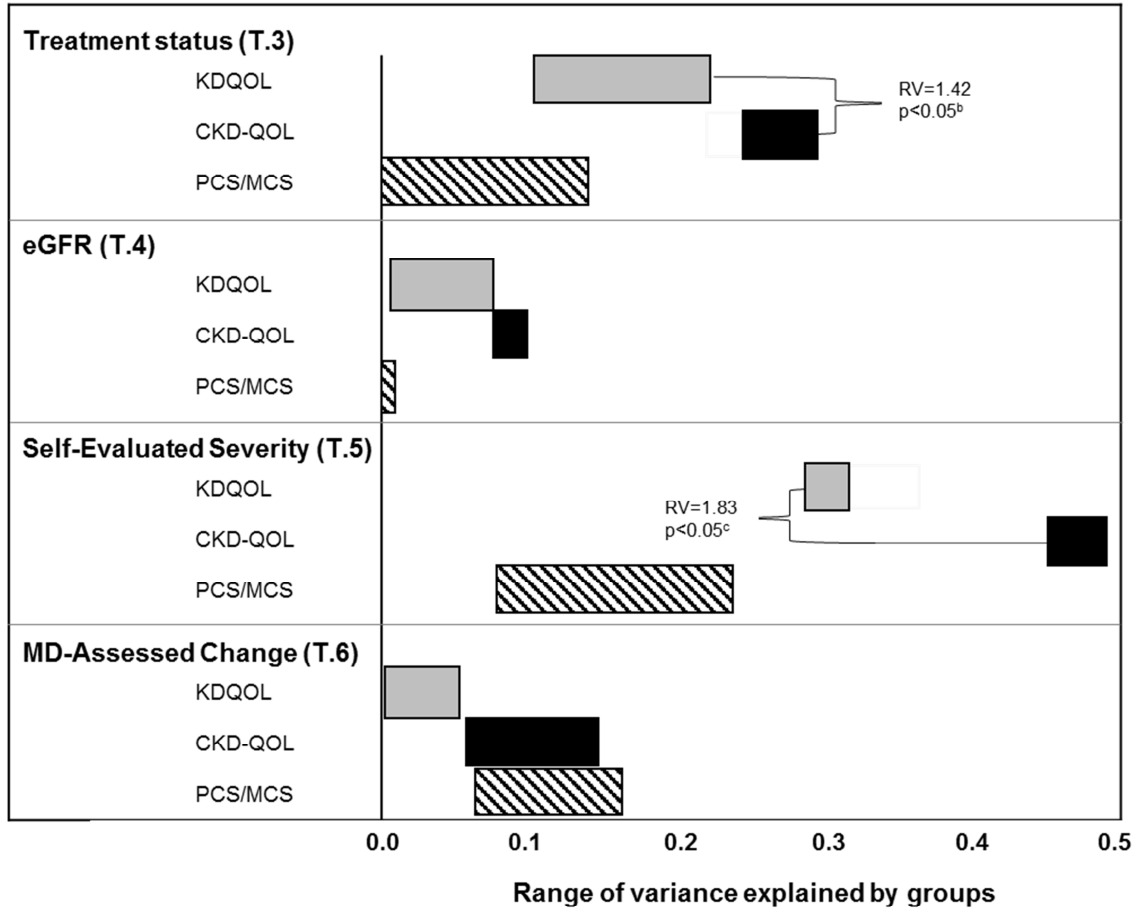

<sup>a</sup>Ranges of variance ( $\eta^2$ ) shown graphically and RV estimates are from Tables 3-6.

<sup>b</sup>RV test favors CKD-QOL-CAT comparator over referent KDQOL Burden scale, p< 0.05, see Table 3

<sup>c</sup>RV test favors three CKD-QOL static and CAT comparators over referent KDQOL Burden scale, p< 0.05, see Table 5.
